# Supplementary material for: Using Digital Media Advertising in Early Psychosis Intervention
Source: Atypon-hosted journal article supplement (doi:10.1176/appi.ps.201600571), 2017-07-17
Supplement: appi.ps.201600571.ds001.pdf [file appi.ps.201600571.ds001.pdf]

 


Psychiatry Online
